# Supplementary material
Source: Springer Nature journal article supplement (https://www.springermedizin.de/resource/supplementary/13054_2011_541_MOESM1_ESM.pdf/9708750)

2228 ICU admissions

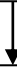

727 CT scans while in ICU  
(173 with contrast enhancement)

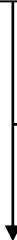

2 patients declined to participate

299 evaluable scans  
(pre-scan collection for clearance,  
catheter to remain for three days)

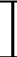

79 with contrast

220 without contrast

53 contrast/non-contrast pairs matched on:  
pre-scan clearance  
vasopressor use  
mechanical ventilation  
diabetes mellitus

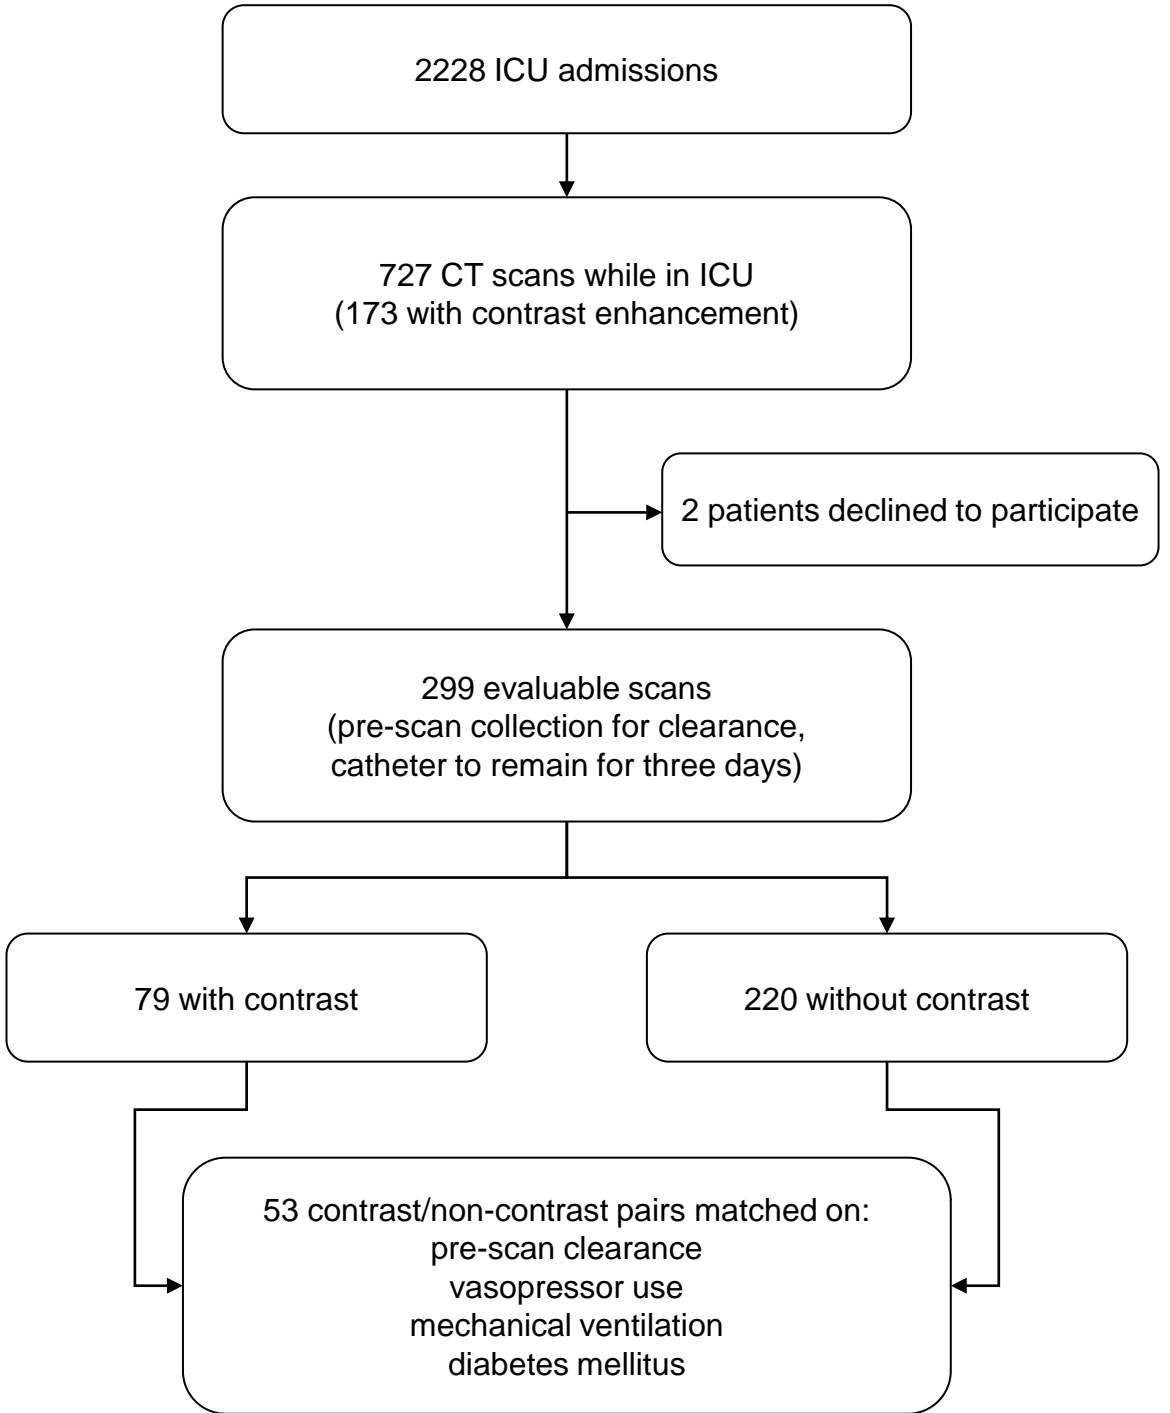

Supplement: MOESM1 [file 9708750]
